# Supplementary material for: Soybean peroxidase immobilised on cellulose-alginate hydrogels for removal of recalcitrant organic pollutants in water
Source: Royal Society of Chemistry journal article supplement (doi:10.1039/d3re00009e), 2023-01-01
Supplement: d3re00009e1.pdf [file d3re00009e1.pdf]

## Soybean peroxidase immobilised on cellulose-alginate hydrogels for removal of recalcitrant organic pollutants in water: supplementary information

Monica Rigoletto, Paola Calza, Alexandre Santuchi da Cunha, Valentina Sederino, Debora Fabbri, Maria Laura Tummino, Enzo Laurenti

**Fig. S1:** Results of 10 consecutive DMAB/MBTH/H<sub>2</sub>O<sub>2</sub> method

activity tests with colorimetric

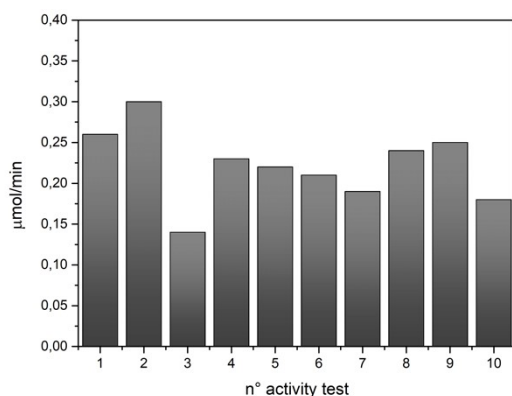

**Fig. S1:** Results of 10 consecutives activity tests of one HY-AC-SBP with DMAB/MBTH/H<sub>2</sub>O<sub>2</sub> colorimetric method expressed in µmol/min of formed purple product

**Fig. S2:** Contribution to abatement % of H<sub>2</sub>O<sub>2</sub> only (initial concentration of 1×10<sup>-4</sup> M) in ultrapure water

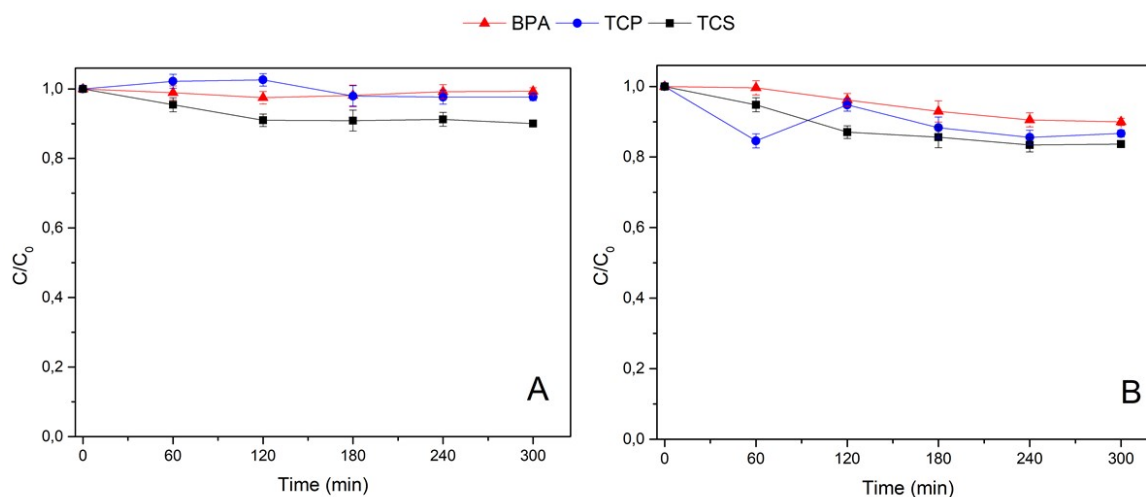

**Fig. S2.** (A) Single contaminant solutions abatement related to H<sub>2</sub>O<sub>2</sub> 10<sup>-4</sup>M in ultrapure water; (B) contaminants mixture solution abatement related to H<sub>2</sub>O<sub>2</sub> 10<sup>-4</sup>M in ultrapure water



Fig. S3: Adsorption of BPA, TCP and TCS with HY-AC-SBP hydrogels

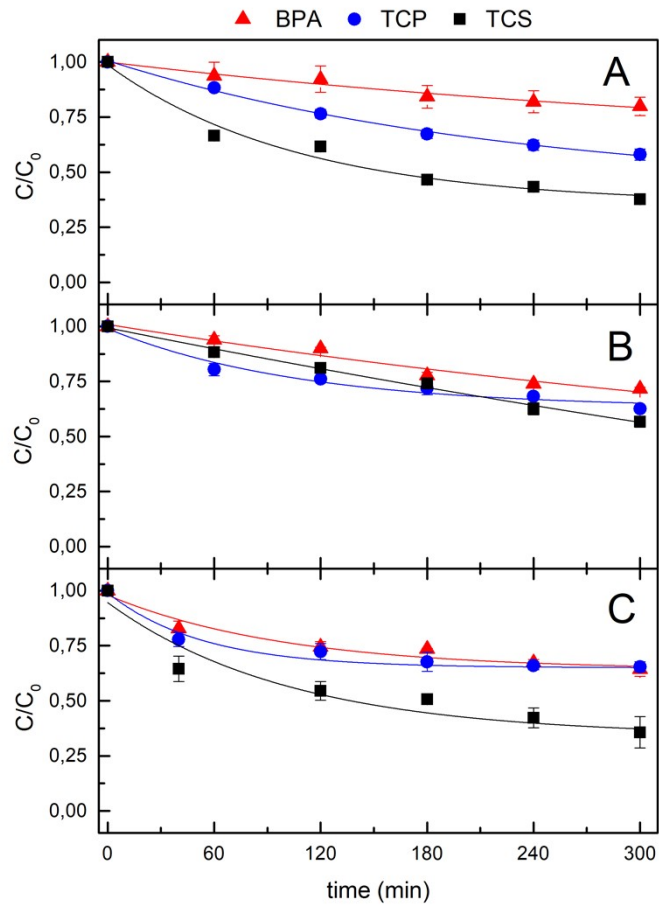

Fig.S3: (A) Adsorption of single contaminant solutions in ultrapure water; (B) Adsorption of contaminants mixture in ultrapure water; (C) Adsorption of contaminants mixture in real water (pond water)

**Fig S4:** Diagram summarizing the radical intermediates generated during the SBP reaction cycle and the main reaction products.

| Substrate         | Radical intermediate | Main reaction product(s) |
|-------------------|----------------------|--------------------------|
| <p><b>TCP</b></p> |                      |                          |
| <p><b>BPA</b></p> |                      |                          |
| <p><b>TCS</b></p> |                      |                          |

Data taken from the following references:

- R. P. Ferrari, E. Laurenti and F. Trotta, *J Biol Inorg Chem*, 1999, **4**, 232–237.
- K. E. Hammel and P. J. Tardone, *Biochemistry*, 1988, **27**, 6563–6568.
- J. Li, J. Peng, Y. Zhang, Y. Ji, H. Shi, L. Mao and S. Gao, *Journal of Hazardous Materials*, 2016, **310**, 152–160.
- Q. Huang and W. J. Weber, *Environ. Sci. Technol.*, 2005, **39**, 6029–6036.

**Fig S5:** Enzymatic removal of and mixture ultrapure water

BPA, TCP and TCS with free SBP in single solutions

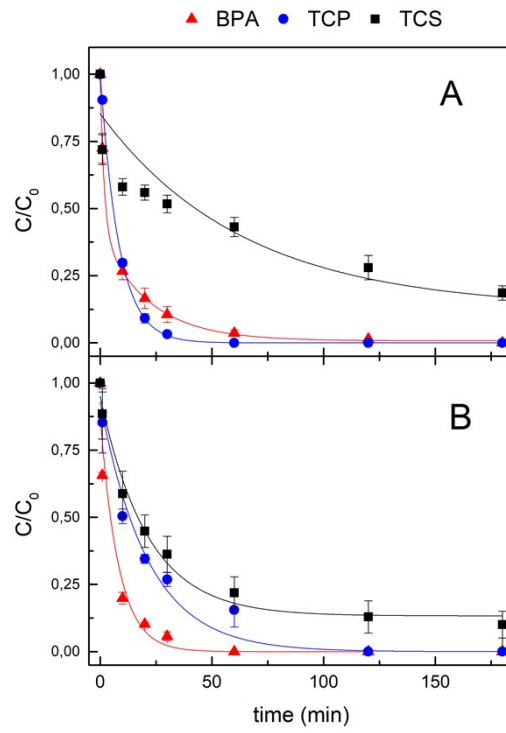

**Fig. S5:** (A) Enzymatic removal results of single contaminant ultrapure water solutions with free SBP; (B) Enzymatic removal results of contaminants mixture ultrapure water solution.

Fig

S6: Additional analysis on TCP

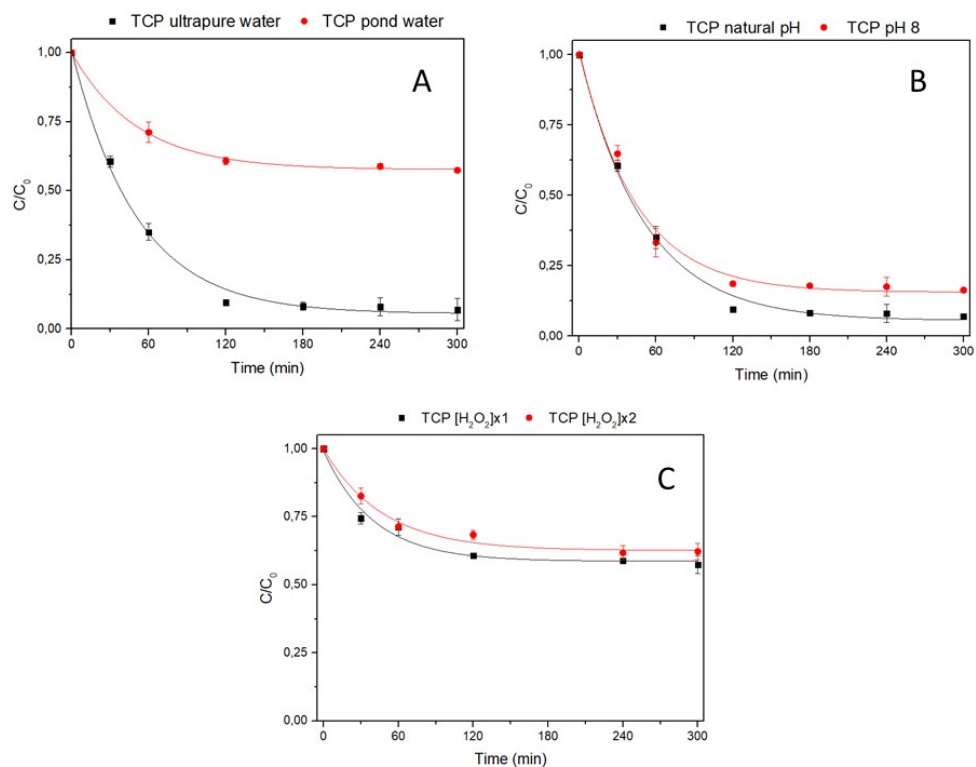

Fig. S6: (A) comparison between enzymatic removal of TCP in ultrapure water and pond water with HY-AC-SBP hydrogels; (B) comparison between enzymatic removal of TCP in ultrapure water at natural pH and pH 8 with HY-AC-SBP hydrogels; (C) comparison between enzymatic removal of TCP in pond water with HY-AC-SBP hydrogels using a normal ( $10^{-4} M$ ) and double ( $2 \times 10^{-4} M$ ) concentration of  $H_2O_2$ .

Fig. S7: Eighth cycle removal trend with the same HY-AC-SBP hydrogels

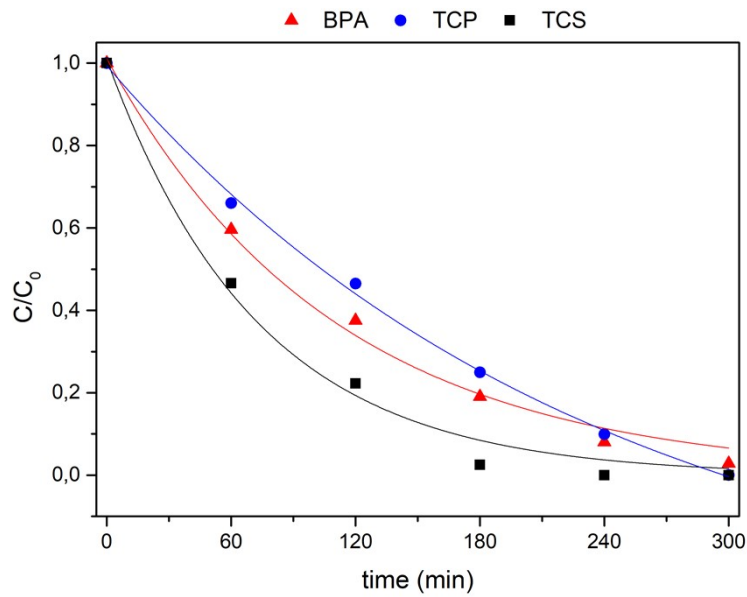

Fig. S7: Removal of BPA, TCP and TCS in the eighth reaction cycle with the same HY-AC-SBP hydrogels

Table S1:  $k_{obs}$  and half-time values for the first and eighth reaction cycles with HY-AC-SBP

| Contaminant | First cycle           |                       | Eighth cycle                |                        |
|-------------|-----------------------|-----------------------|-----------------------------|------------------------|
|             | $k_{obs}$ first cycle | $t_{1/2}$ first cycle | $k_{obs}$ eighth cycle      | $t_{1/2}$ eighth cycle |
| BPA         | 0,015±0,001           | 46±4                  | 0,009±4,15x10 <sup>-4</sup> | 76±3,5                 |
| TCP         | 0,037±0,001           | 19±0,3                | 0,0082±8x10 <sup>-4</sup>   | 84,4±8                 |
| TCS         | 0,027±0,001           | 26±1,2                | 0,0138±9,2x10 <sup>-4</sup> | 50,2±3,35              |
